# Supplementary material for: Biosynthesis of the Novel Endogenous 15-Lipoxygenase Metabolites N-13-Hydroxy-octodecadienoyl-ethanolamine and 13-Hydroxy-octodecadienoyl-glycerol by Human Neutrophils and Eosinophils
Source: MDPI journal article supplement (doi:10.3390/cells10092322), 2021-09-05
Supplement: s1 [file s1]

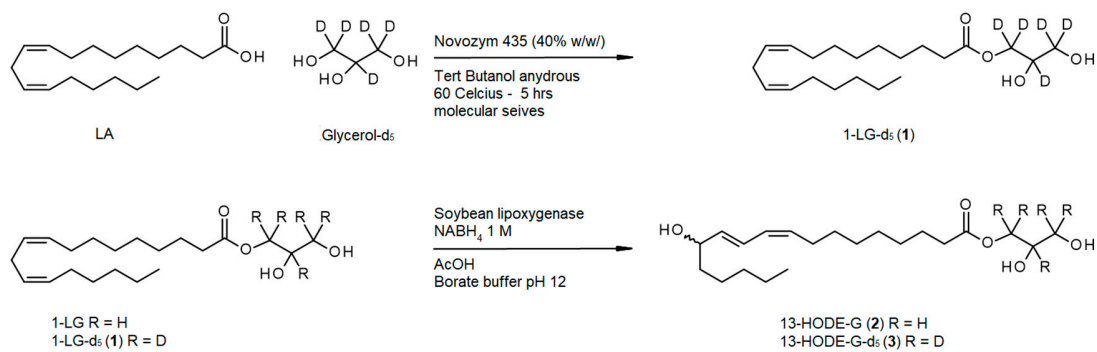

**Figure S1. Strategy to synthesize 1-LG- $d_5$ , 13-HODE-G and 13-HODE-G- $d_5$ .** LA and glycerol- $d_5$  were incubated with Novozym 435 to yield 1-LG- $d_5$ . 1-LG or 1-LG- $d_5$  were then oxygenated by soybean lipoxygenase to yield 13-HODE-G and 13-HODE-G- $d_5$  respectively.

PROTON\_01

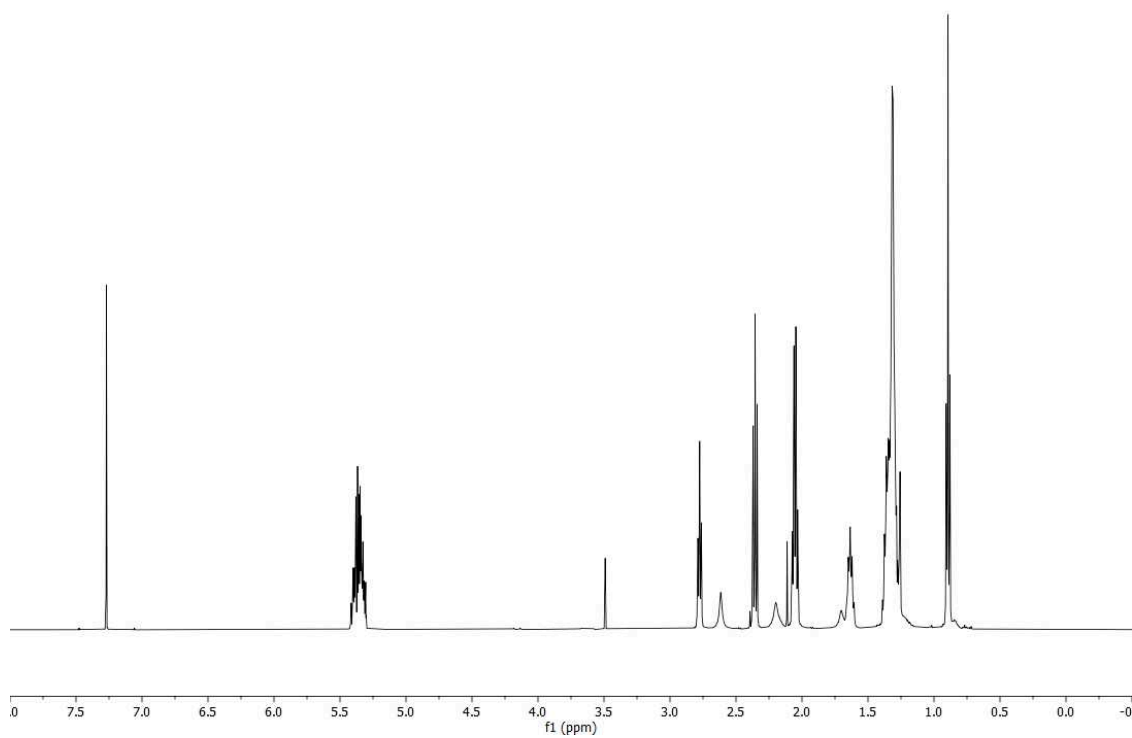

**Figure S2.**  $^1\text{H}$ -NMR in  $\text{CDCl}_3$  of 1-LG- $\text{d}_5$  (1).

CARBON\_01

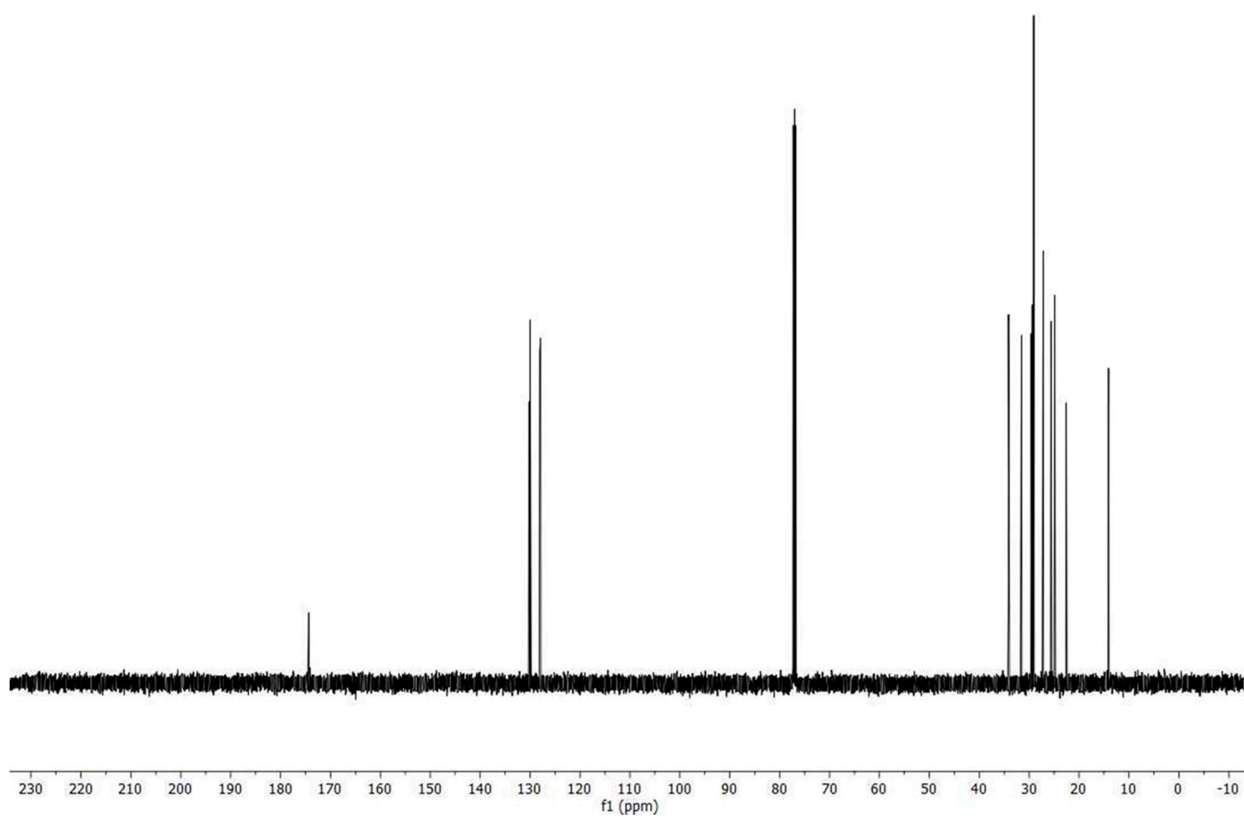

**Figure S3.**  $^{13}\text{C}$ -NMR in  $\text{CDCl}_3$  of 1-LG- $\text{d}_5$  (1).

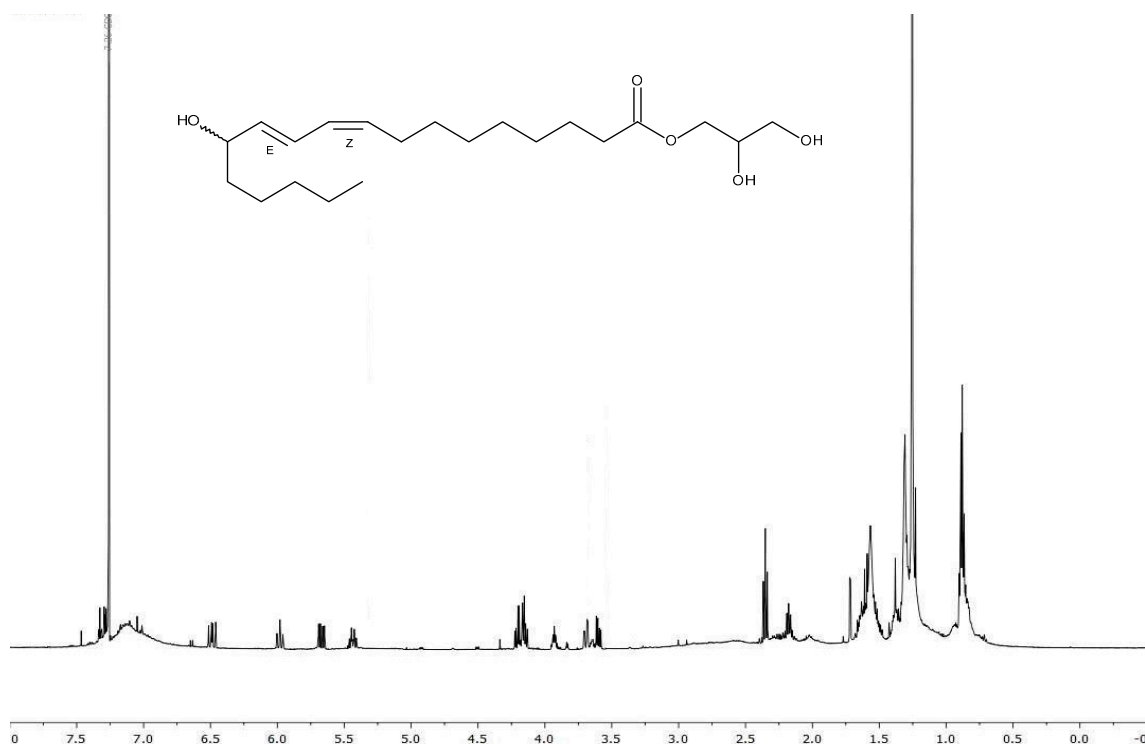

**Figure S4.**  $^1\text{H}$ -NMR in  $\text{CDCl}_3$  of 13-HODE-G (2).

CARBON\_01

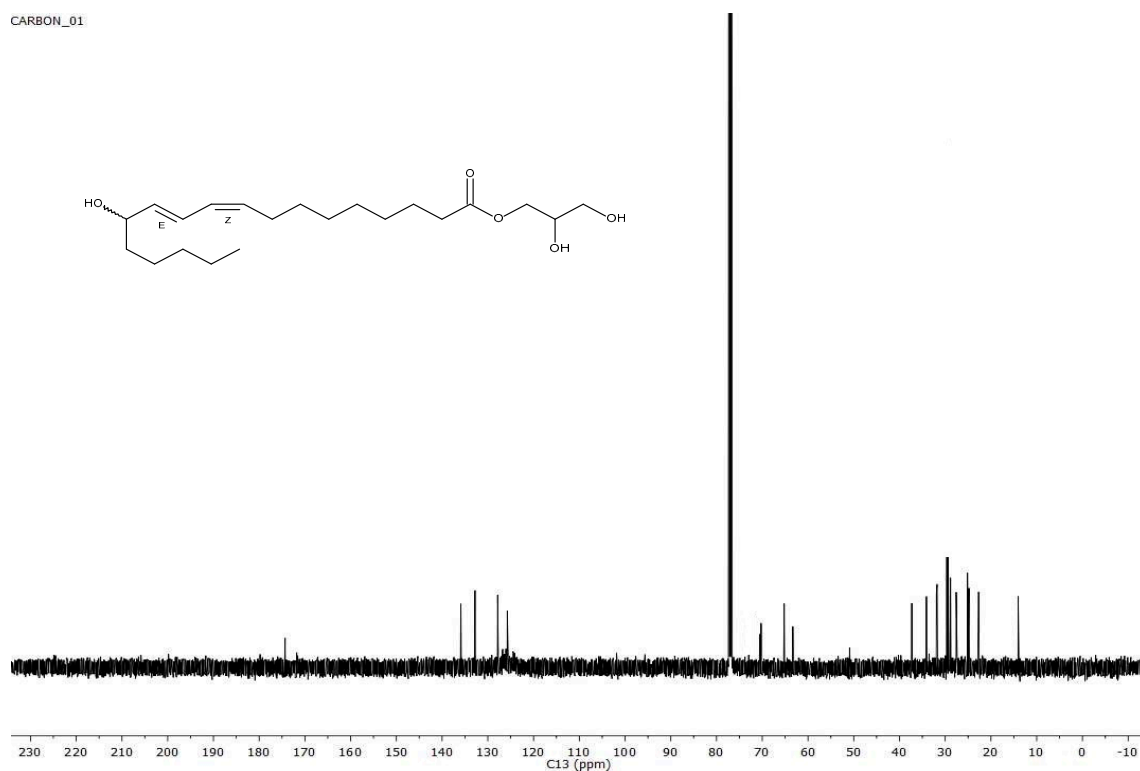

Figure S5.  $^{13}\text{C}$ -NMR in  $\text{CDCl}_3$  of 13-HODE-G (2).

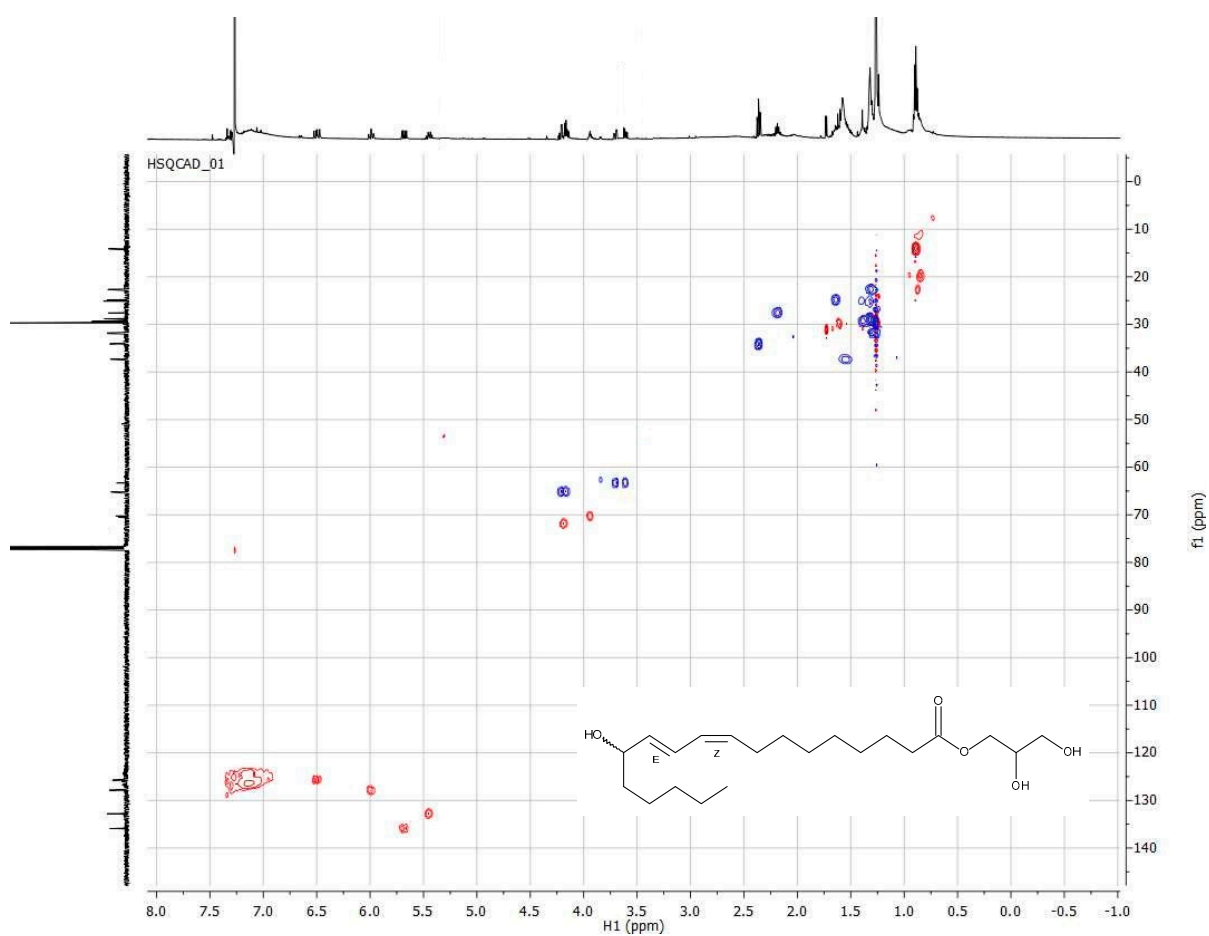

**Figure S6. HSQC in CDCl<sub>3</sub> of 13-HODE-G (2).**

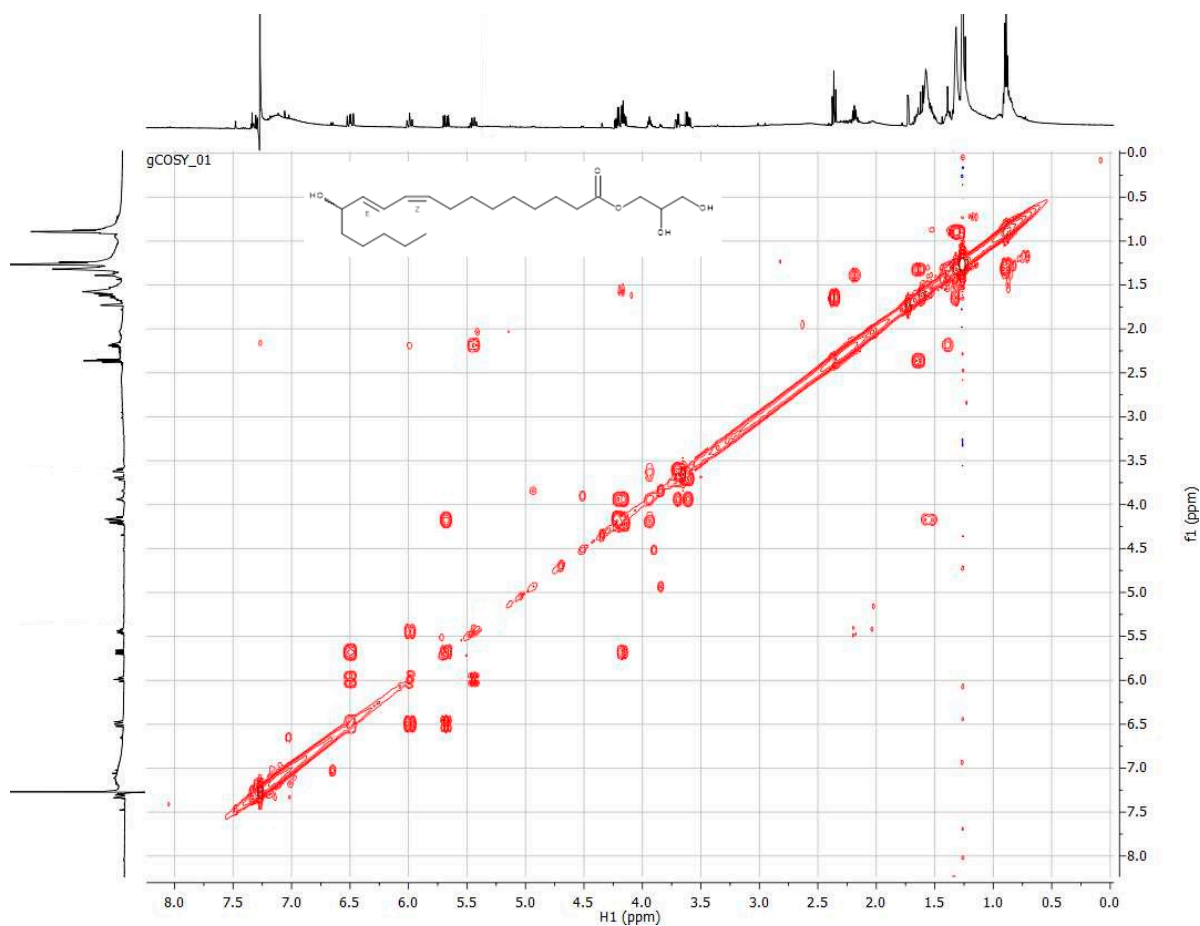

**Figure S7. COSY in  $\text{CDCl}_3$  of 13-HODE-G (2).**

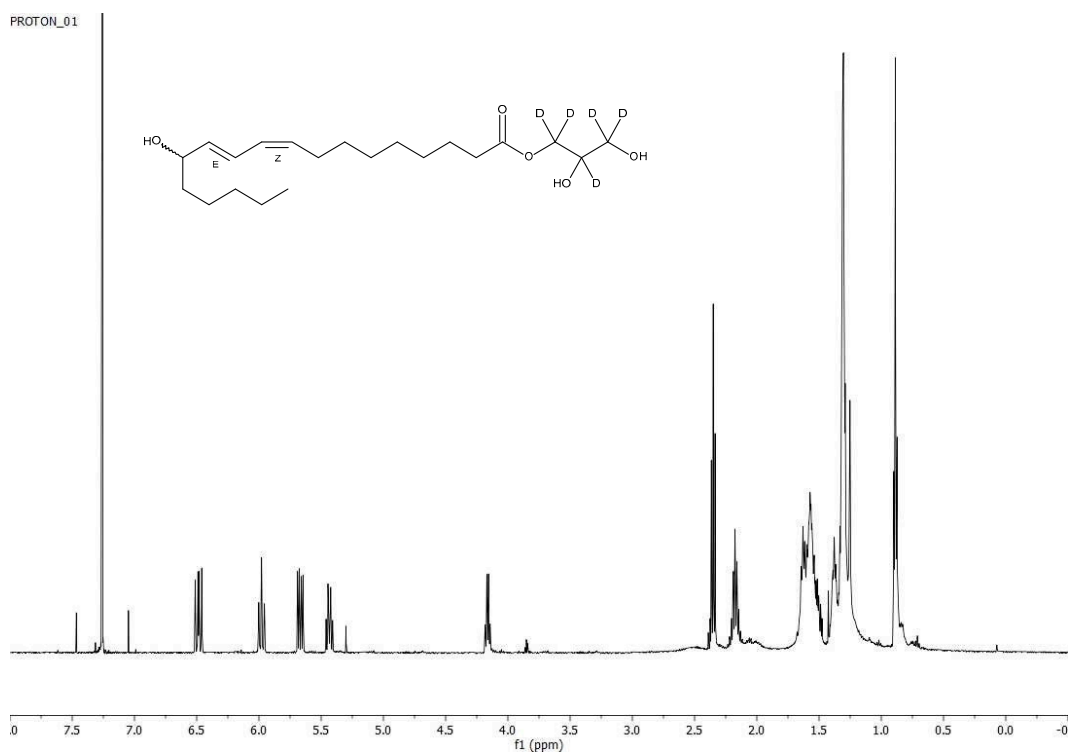

**Figure S8.** <sup>1</sup>H-NMR in CDCl<sub>3</sub> of 13-HODE-G-d<sub>5</sub> (3).



CARBON\_01

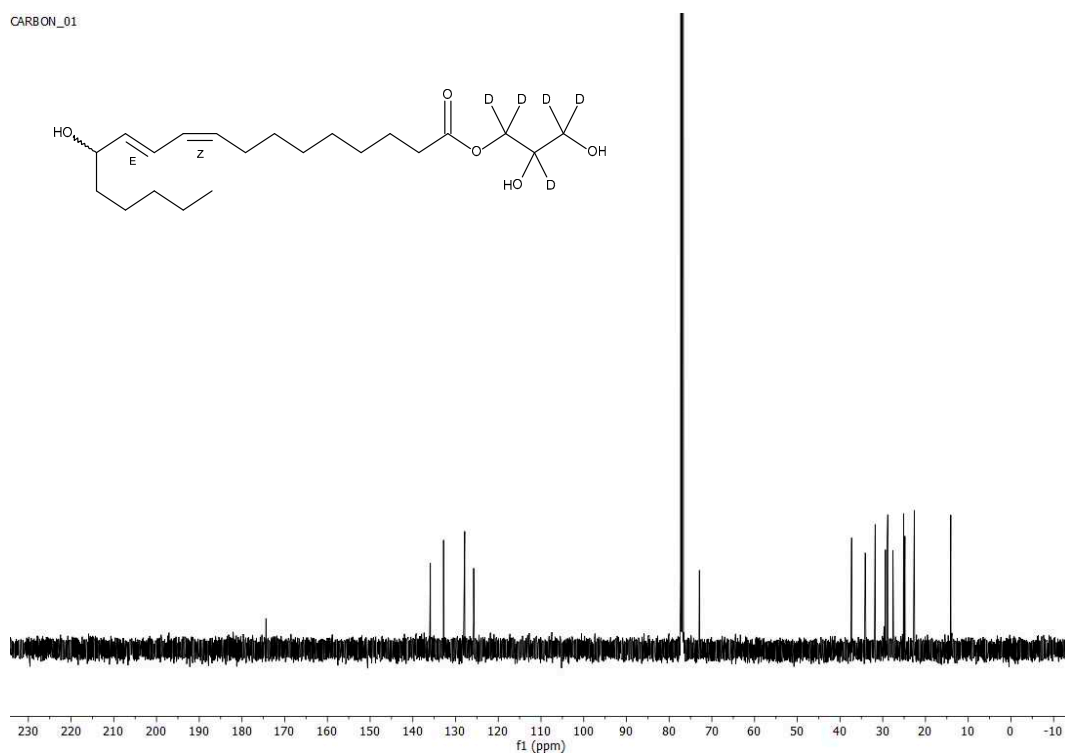

**Figure S9.** <sup>13</sup>C-NMR in CDCl<sub>3</sub> of 13-HODE-G-d<sub>5</sub> (3).

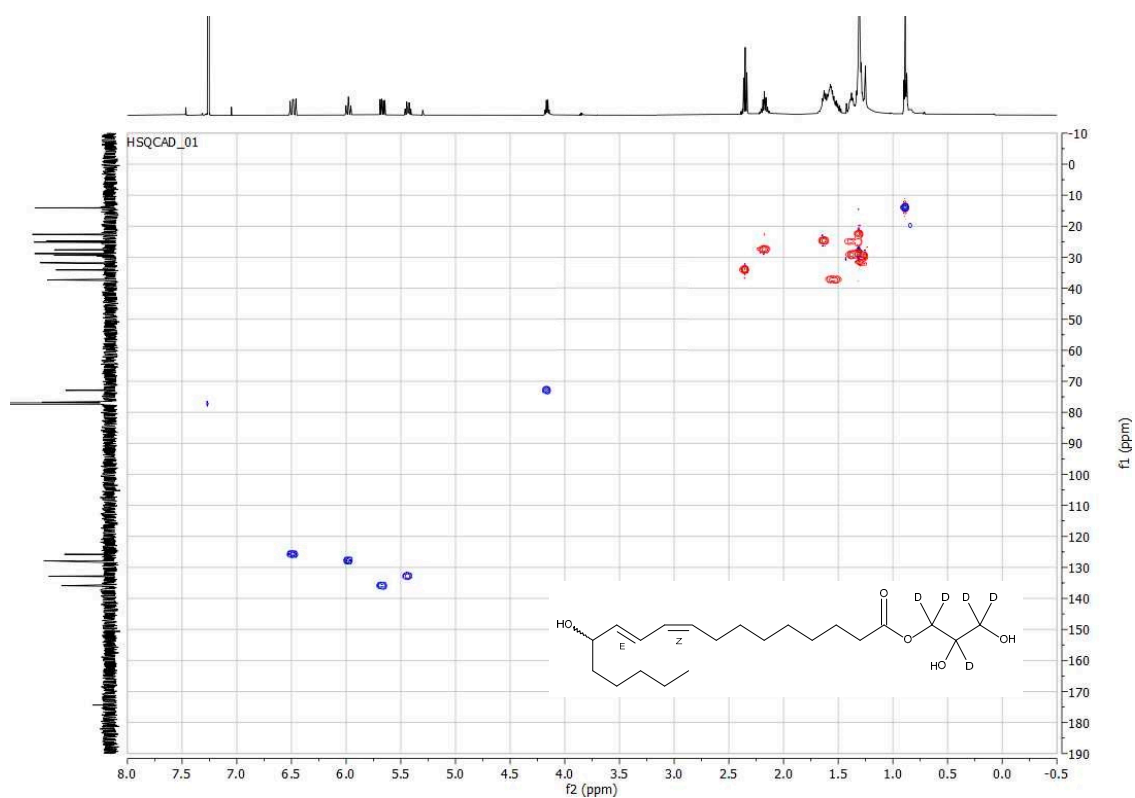

**Figure S10.** HSQC in CDCl<sub>3</sub> of 13-HODE-G-d<sub>5</sub> (3).

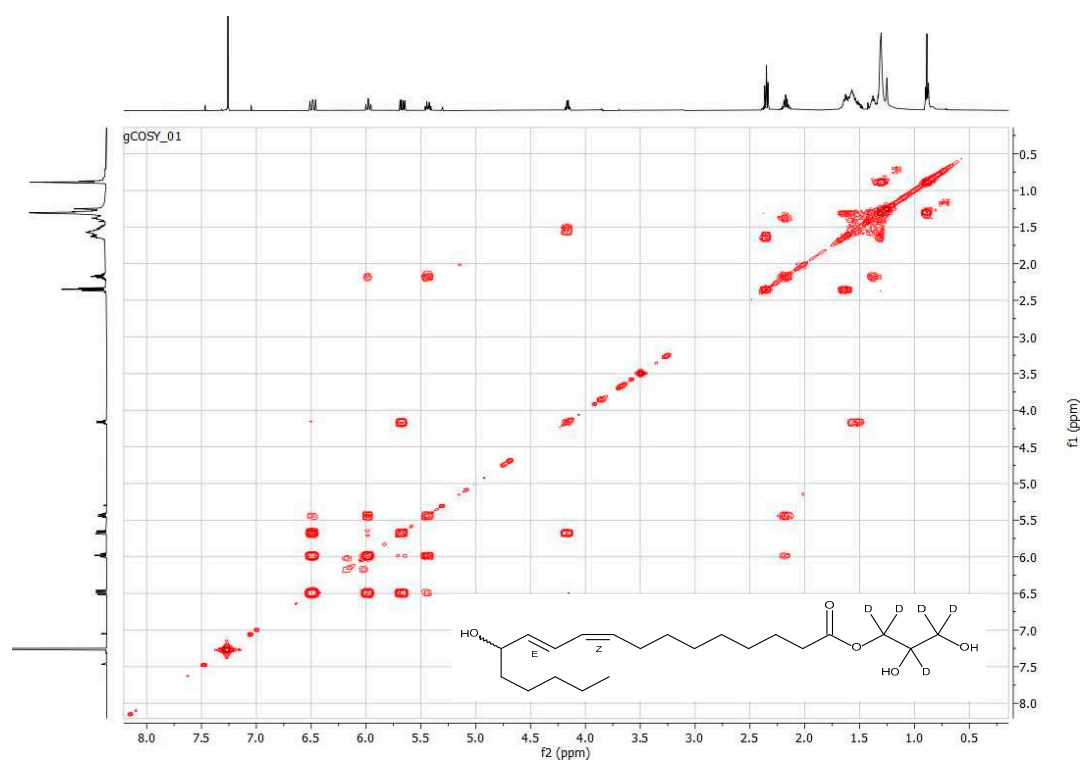

**Figure S11. COSY in CDCl<sub>3</sub> of 13-HODE-G-d<sub>5</sub>.**
